# Supplementary material
Source: Springer Nature journal article supplement (http://www.springermedizin.de/resource/supplementary/12883_2013_912_MOESM1_ESM.pdf/9456152)
Supplement: MOESM1 [file 9456152]

Screening participants for  
eligibility to participate in study  
n=50

Experimental group at Centre 1  
n=27 screened

5 participants excluded:  
(1 did not meet criteria  
for age range; 2 had Mini  
Mental Status  
Examination (MMSE)  
<17; 1 was not a stroke  
survivor; 1 refused to  
participate)

Experimental group in centre 1,  
n=22

3 participants never  
attended intervention  
sessions; 3 participants  
later refused to participate;  
1 participant withdrew due  
to a transport problem

Post-intervention  
measurements at 6th  
week or 12 sessions of  
intervention  
n=15

Control group at Centre 2,  
n=23 screened

9 participants excluded:  
(4 did not meet criteria for  
age range; 2 had Mini  
Mental Status Examination  
(MMSE) <17; 1 was not a  
stroke survivor; 1 was not  
able to stand without  
support; 1 refused to  
participate)

Control group in centre 2,  
n=14

1 participant  
withdrew due to a fall  
at home

Post-intervention  
measurements at 6th  
week or 12 sessions of  
intervention  
n=13
